# Supplementary material for: Precision dynamical mapping using topological data analysis reveals a hub-like transition state at rest
Source: PubMed Central journal article supplement (PMC9378660; doi:10.1038/s41467-022-32381-2), 2022-08-15
Supplement: 41467_2022_32381_MOESM1_ESM.pdf [file 41467_2022_32381_MOESM1_ESM.pdf]

## Supplementary Information for:

### Precision dynamical mapping using topological data analysis reveals a hub-like *transition state* at rest

Manish Saggar<sup>a\*</sup>, James M. Shine<sup>b</sup>, Raphaël Liégeois<sup>c,d</sup>, Nico U. F. Dosenbach<sup>e</sup>, Damien Fair<sup>f</sup>

<sup>a</sup>Department of Psychiatry and Behavioral Sciences, Stanford University, Stanford, CA, USA

<sup>b</sup>Brain and Mind Center, The University of Sydney, Sydney, New South Wales, Australia

<sup>c</sup>Institute of Bioengineering, École Polytechnique Fédérale de Lausanne, Switzerland

<sup>d</sup>Department of Radiology and Medical Informatics, Faculty of Medicine, University of Geneva

<sup>e</sup>Departments of Neurology, Radiology, Pediatrics and Biomedical Engineering, Washington

University School of Medicine, St. Louis, MO, USA

<sup>f</sup>Department of Pediatrics, University of Minnesota Medical School, Minneapolis, MN, USA

\* Corresponding Author: [saggar@stanford.edu](mailto:saggar@stanford.edu)

18 **Supplementary Figures**  
 19

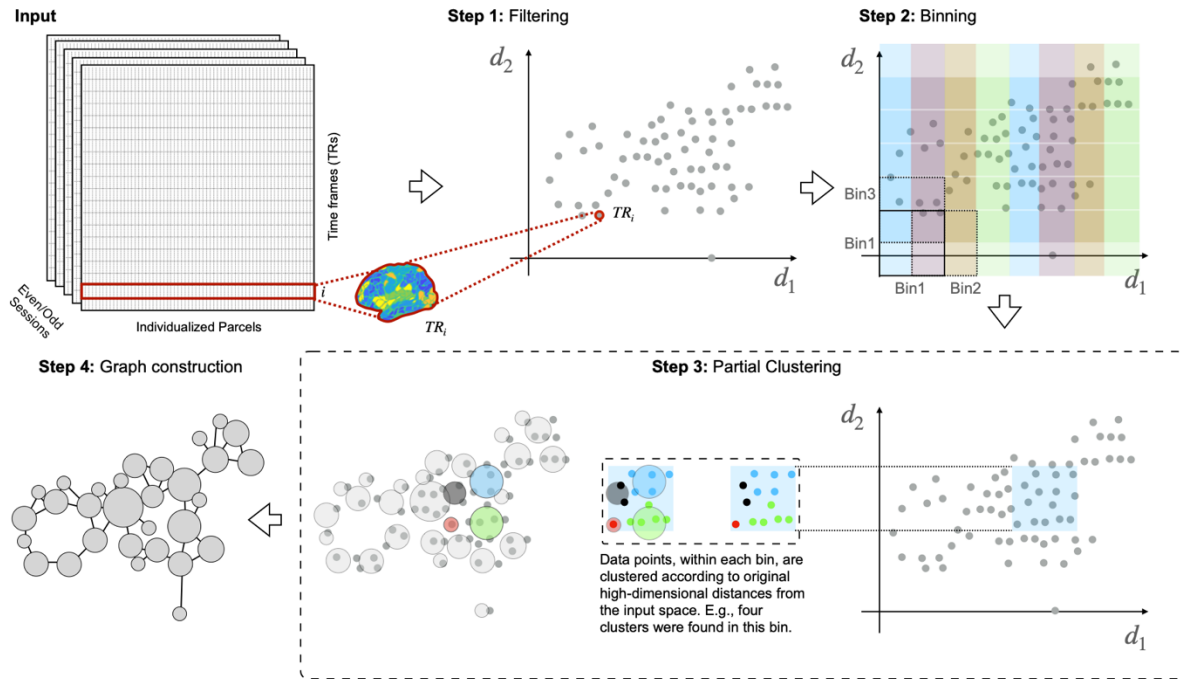

20  
 21 **Fig. S1: Step-by-step representation of the Mapper pipeline.** First, the high-dimensional  
 22 neuroimaging data are embedded into a lower dimension set  $d_i$ , using a non-linear filter function  
 23  $f$ . Here, a nonlinear filter function  $f$  based on neighborhood embedding was used (see Methods  
 24 for benefits of this non-linear approach). Second, overlapping  $d$ -dimensional binning is  
 25 performed to allow for compression and to reduce the destructive effects of noise. Third, partial  
 26 clustering within each bin is performed, where the original high dimensional information is used  
 27 for coalescing (or separating) data points into nodes in the low-dimensional space and hence  
 28 allows for recovering information loss incurred due to dimensional reduction. As a fourth step, to  
 29 generate a graphical representation of the data landscape, nodes from different bins are  
 30 connected if any data points are shared between them.  
 31  
 32

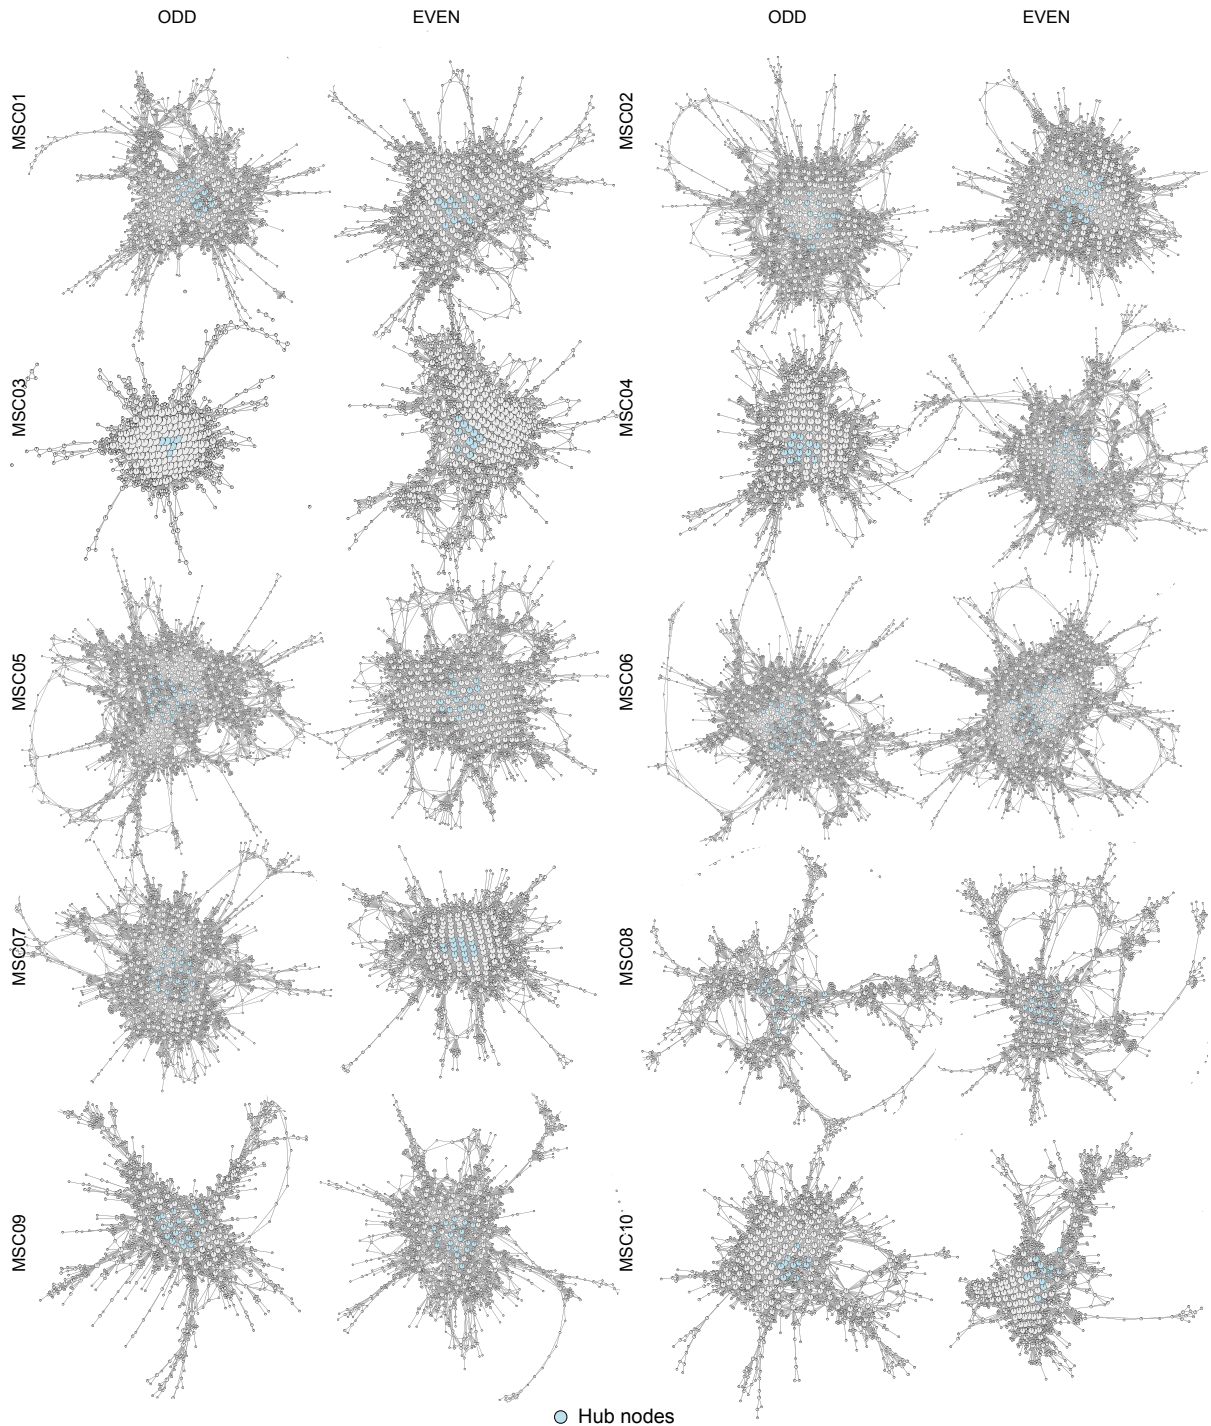

33  
 34  
 35  
 36  
 37  
 38  
 39

**Fig. S2: Shows hubs across all ten MSC participants.** Show Mapper-generated graphs for all 10 MSC participants and their respective data splits. Hubs (i.e., nodes with high degree (>20) and high centrality (top 1%)) are highlighted in blue color. As evident, these hubs were found across all participants and sessions.



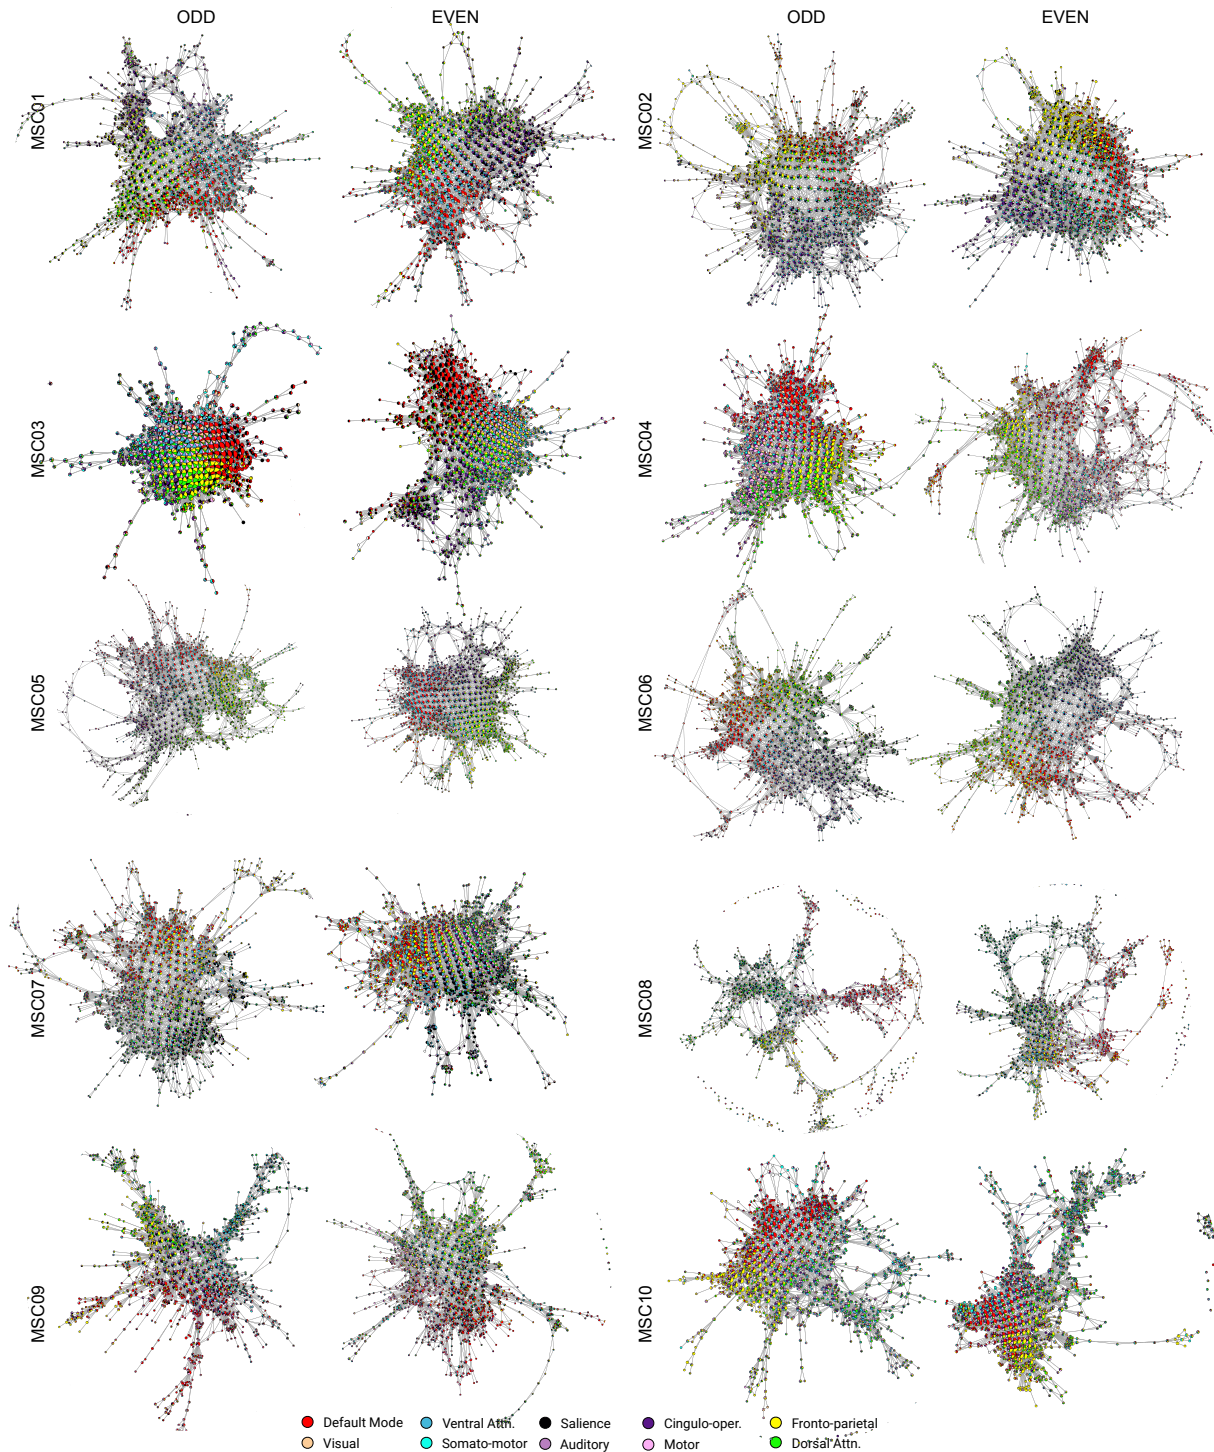

41  
 42 **Fig. S3: RSN-based annotation across all ten MSC participants.** Shows Mapper-generated  
 43 graphs for all 10 MSC participants. Here, each node is annotated by activation in the known  
 44 large-scale resting state networks. Each node is annotated using a pie-chart to show the  
 45 proportion of RSNs activated within each node. As evident, topologically highly connected, and  
 46 centrally located hubs contained brain volumes where no characteristic RSN was activated  
 47 above the mean, whereas nodes with brain volumes dominating from one (or more) RSN(s)  
 48 tend to occupy the peripheral corners of the landscape. The maps for all individual subjects

49 demonstrated this same basic pattern, although there was evidence to suggest that different  
50 combinations of RSNs were dominant in different individuals.

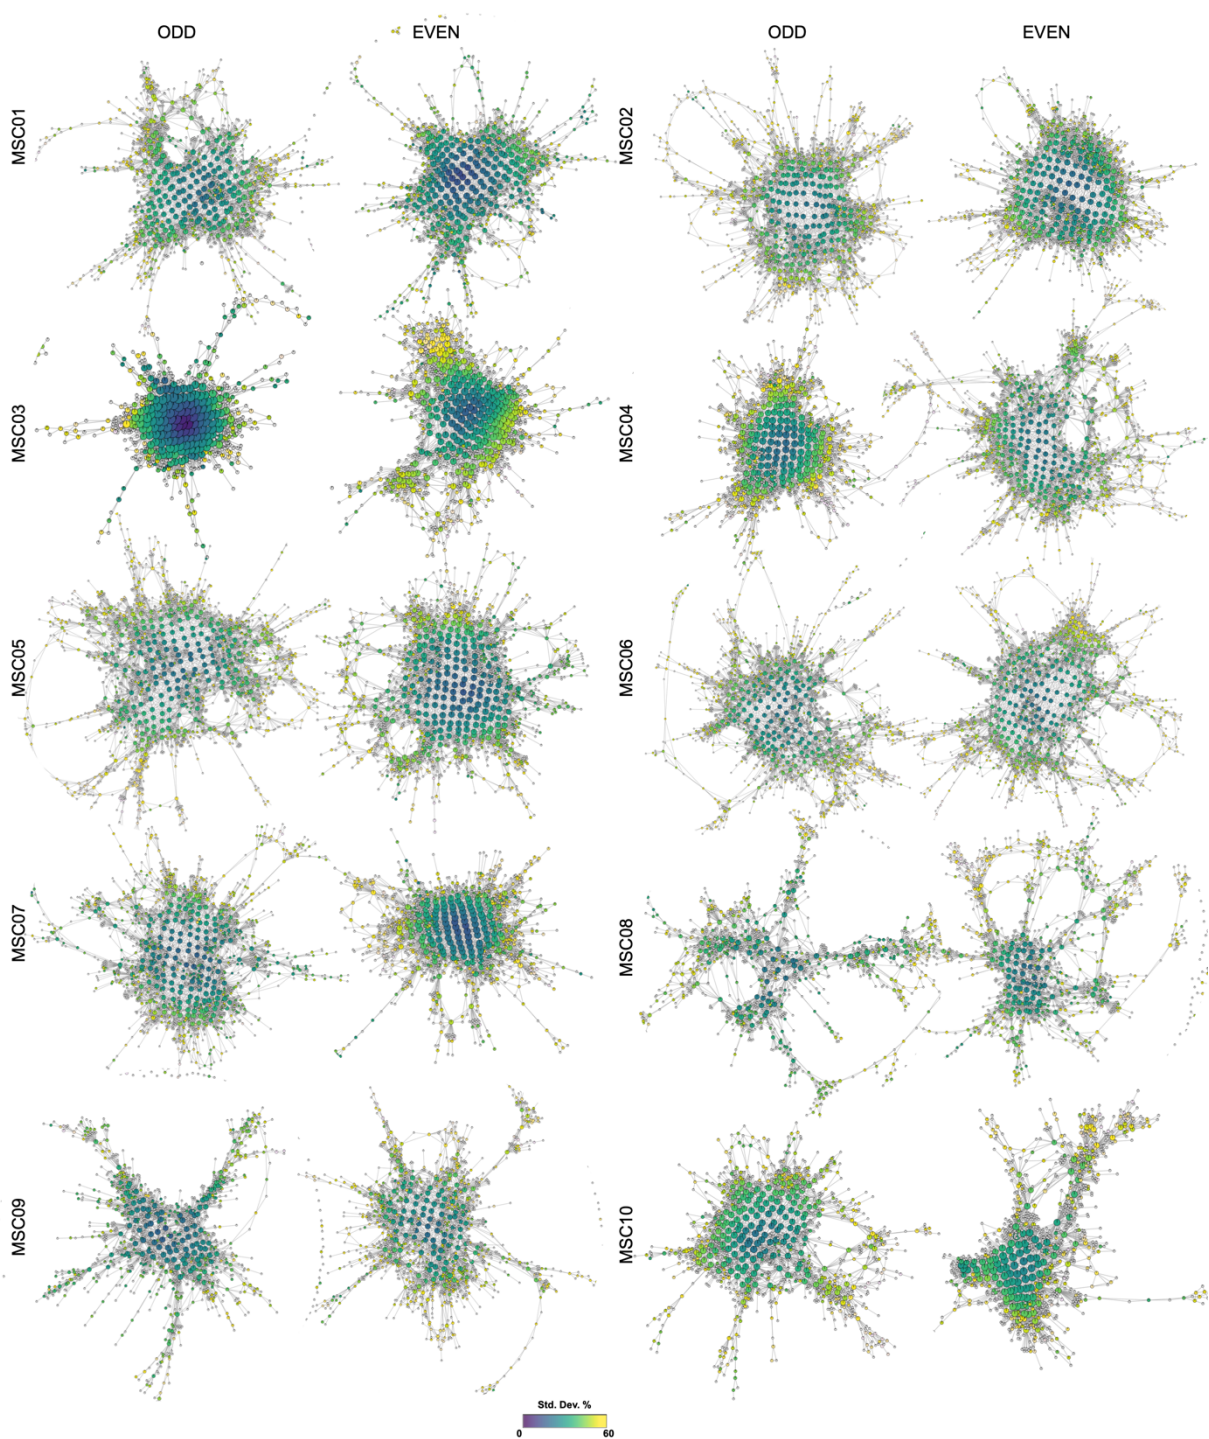

51  
 52 **Fig. S4: Gradient was observed across all ten MSC participants.** To quantify the variation in  
 53 RSN-based dominance, we first estimated mean activation for each RSN across the time  
 54 frames within each node, followed by estimating variation in mean activation across RSNs. High  
 55 variance (or S.D.) indicated dominance of one or more RSN while low variance (or S.D.)  
 56 indicated uniformity across RSN activation. Annotating Mapper-generated graphs using  
 57 variance-based approach revealed a dynamical topographic gradient, where the peripheral

58 nodes had higher variance with a continual decrease in variance when going towards the center  
59 of the graph. This topographic gradient was observed across all participants and sessions.  
60  
61

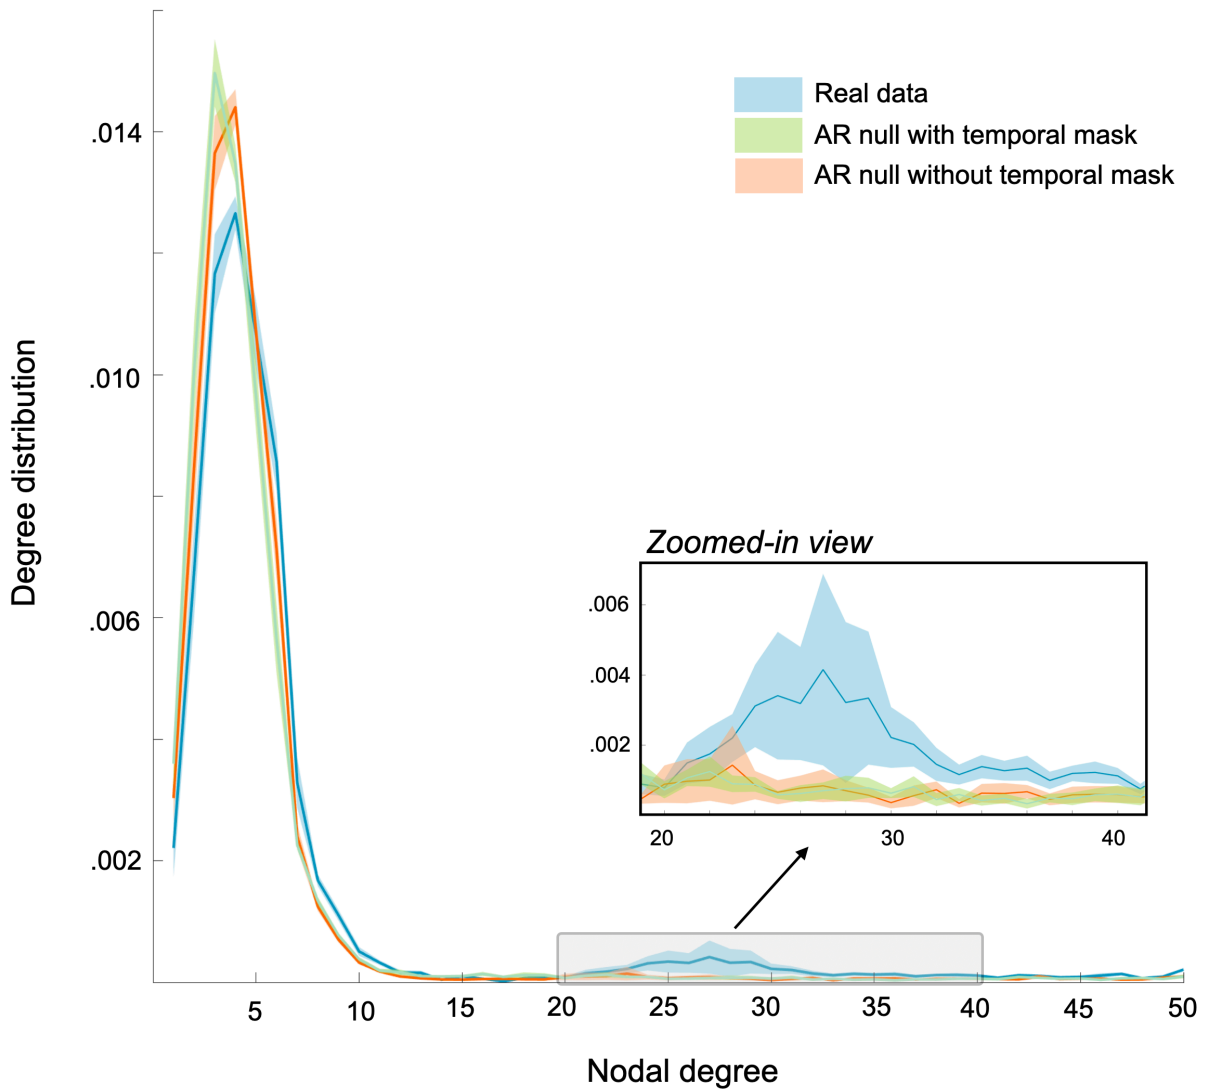

62 **Fig. S5: Applying frame censoring to the data generated from null models to evaluate**  
63 **whether high degree nodes observed in the real data were resulted merely due to**  
64 **temporal masking.** Please note that the frame censoring could only be applied to the data  
65 generated from the AR null, as it is a generative model, and we could create same number of  
66 TRs as the original (non-censored) data and then drop frames from it to match the number of  
67 frames in the real data. As evident, adding frame censoring to the data generated using AR null  
68 did not result in enhancing the number of high degree nodes. Statistically, the proportion of high  
69 degree nodes in real data were still significantly higher than both AR nulls (one-way ANOVA;  
70  $F=4.11$ ,  $p=0.0276$ ). Only showing data from the odd split, similar results were observed for the  
71 even split of the data. The shaded area represents standard error around the mean (S.E.M.).  
72



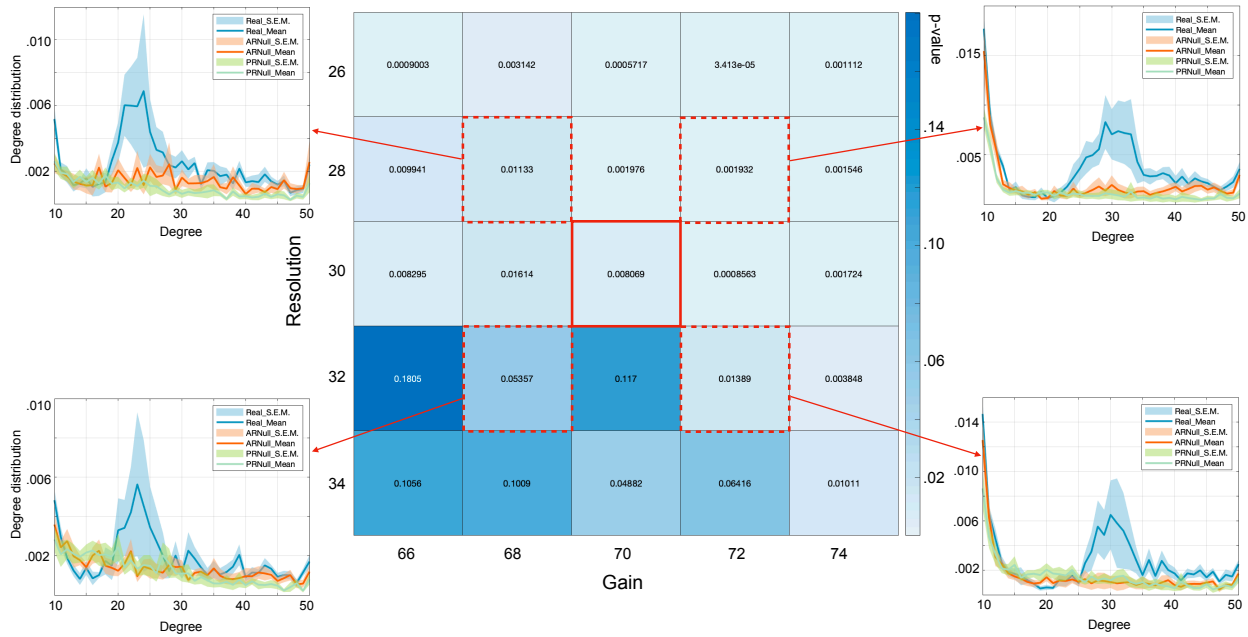

74  
 75 **Fig. S6: Parameter perturbation analysis revealed stable results across a moderate range**  
 76 **of Mapper parameters.** Parameter perturbation analysis was performed to make sure  
 77 topological properties of the graph (e.g., existence of fat tail in degree distribution)  
 78 were stable across a moderate range of Mapper parameters. Two main Mapper parameters, i.e., number of  
 79 bins (a.k.a. Resolution (R)) and percentage overlap between bins (a.k.a. Gain (g)) were varied  
 80 across the chosen value in the main text (R=30, G=70). The values of R and G were chosen  
 81 based on our previous work with task fMRI data (Saggar et al. 2018; Nat. Comm.). The heatmap  
 82 above shows p-values from one-way ANOVAs that examined the proportion of high-degree  
 83 nodes (>20) in the real versus null data for the odd sessions. As evident, for a large portion of  
 84 Mapper parameter values, the proportion of high-degree nodes in the real data were  
 85 significantly higher than null data. We also depict zoomed-in view of degree distribution plots for  
 86 several parameter combinations (highlighted in red-dashed border on the heatmap) to show the  
 87 excessive proportion of high-degree nodes in real data across different combinations of  
 88 parameters. The shaded area in the degree distribution plots represents standard error around  
 89 the mean (S.E.M.).

90  
 91

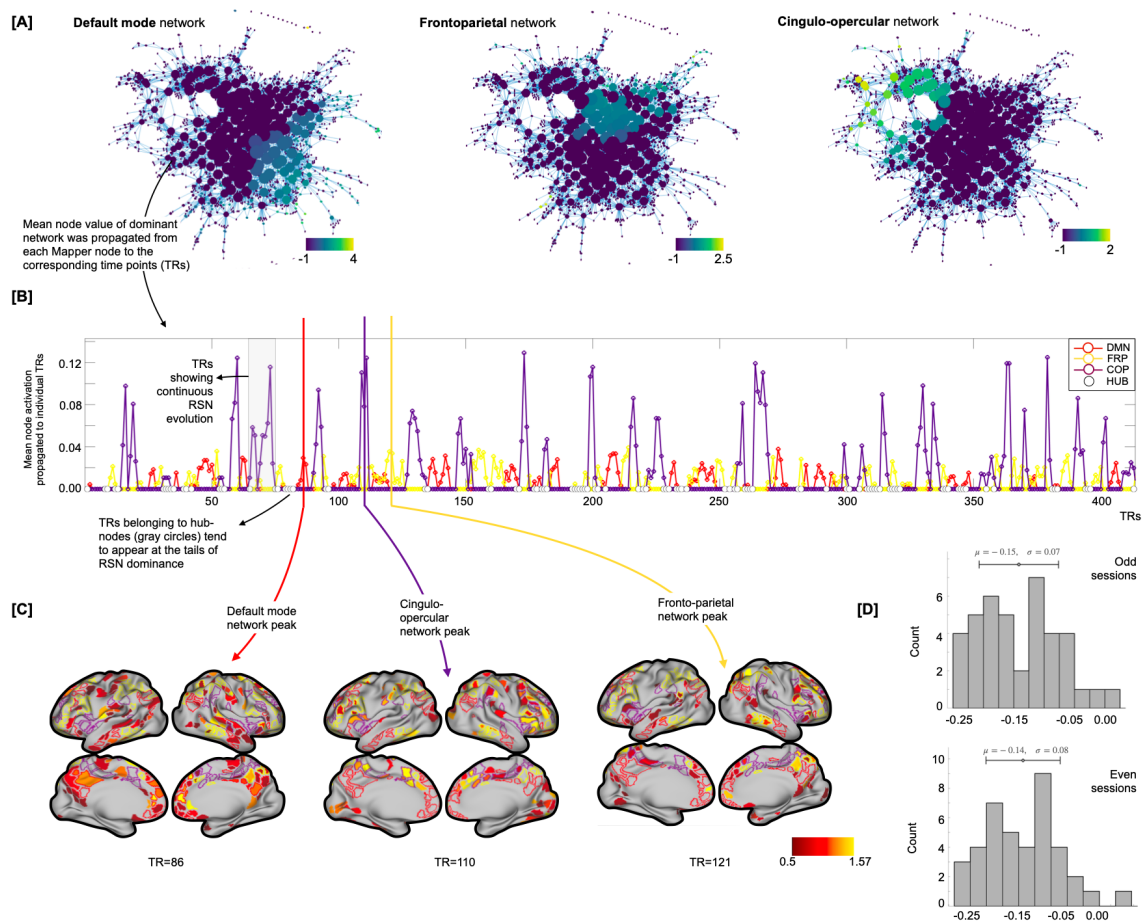

92  
 93 **Fig. S7: The nodal mean of each dominant network was propagated into time domain**  
 94 **(individual TRs) to examine the continuous and transitory nature of RSN-dominance vs**  
 95 **hub-states. [A]** Mapper nodes are annotated by activation in three dominant RSNs relative to  
 96 mean activations of all other RSNs for one representative participant (MSC-01, odd sessions).  
 97 As expected, for each dominant RSN, we observed a gradient of mean activation across nodes  
 98 in the Mapper graph – such that peripheral nodes contained timeframes (or TRs) with the  
 99 highest activation, while more central nodes contained TRs with low activation. As evident in  
 100 **[B]**, the activation of each of the three dominating networks (default mode, frontoparietal, and  
 101 cingulo-opercular) are continuous in nature and, importantly, the hub-states tend to appear at  
 102 the tails of RSN dominance – putatively triggering transitions between RSNs. **[C]** Cortical  
 103 activations are shown for three representative TRs for each dominant network. **[D]** Histogram of  
 104 temporal correlation between the mean amplitude of dominant RSNs and hub-state occurrences  
 105 across all ten participants (separately shown for odd and even sessions). As evident, negative  
 106 relation between the occurrence of hub-states and activation in one or more RSNs was  
 107 observed. The brain overlays were created by the authors using Connectome Workbench Software  
 (<https://www.humanconnectome.org/software/connectome-workbench>).

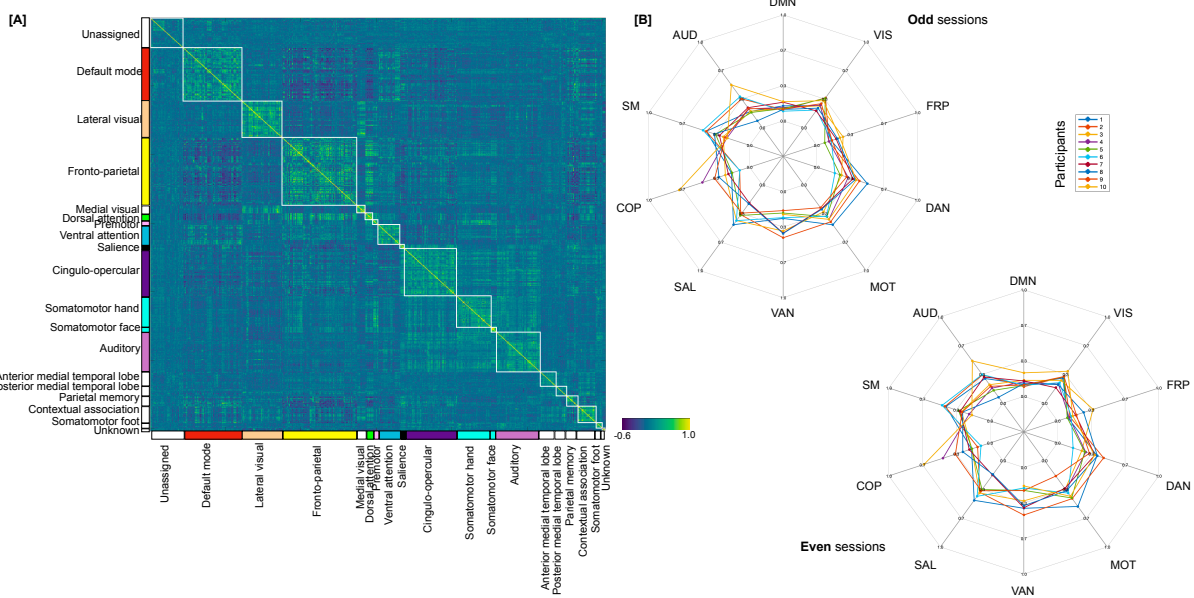

108  
 109 **Fig. S8: Examining connectivity profile of hub states.** [A] Functional connectivity derived  
 110 from timeframes of hub Mapper nodes for one representative participant (MSC01, odd  
 111 sessions). The connectivity matrix is organized by RSNs. Uniform within network connectivity is  
 112 observed across all networks. [B] Spider charts showing within-network connectivity (derived  
 113 from hubs) across all 10 participants, separately for odd and even sessions. Although Mapper  
 114 graphs were generated using activation data (and not connectivity estimates), within network  
 115 functional connectivity derived from hubs also suggest no preference for any RSN.  
 116
